# Supplementary material for: I Can See It in Your Eyes: Gaze as an Implicit Cue of Uncanniness and Task Performance in Repeated Interactions With Robots
Source: Frontiers journal article supplement (doi:10.3389/frobt.2021.645956), 2021-04-07
Supplement: Data_Sheet_1.PDF [file Data_Sheet_1.PDF]

# Supplementary Material

## 1 WIZARDING INTERFACE

### 1.1 Pre-Game Social Chat

#### Session 1

| Wake up robot                                                                                                                                                          | Start | Enable Questionnaire | Q | General responses:                  |
|------------------------------------------------------------------------------------------------------------------------------------------------------------------------|-------|----------------------|---|-------------------------------------|
| <b>Introduction:</b><br>Hi, I'm Neil. What's your name?      Awesome, nice to meet you                                                                                 |       |                      |   | Yes                                 |
| <b>Playing the game together:</b><br>Excited playing the game      User: excited      User: Not excited      User: Undecided      Robot likes logic puzzles            |       |                      |   | No                                  |
| <b>Studying:</b><br>What do you study?      Sounds cool!      Robots likes Computer Science      Robot: Philosophy      Reason for philosophy                          |       |                      |   | I am not sure                       |
| <b>Where are you from:</b><br>Originally Uppsala?      Where are you from?      Local      Robot: Stockholm      Wow, that's quite far      Recommend in your country? |       |                      |   | Let me think about it               |
| Around the corner      Go home often?      Robots: Going home      Favorit place in Uppsala?      Robot's favorite place                                               |       |                      |   | I'm very young                      |
| <b>Weather:</b><br>How do you like Swedish weather?      I also don't like when it's so cold      I don't like winters here      I get sad when it's so cold           |       |                      |   | I'm almost four years old           |
| I love when it snows      I love summer in Sweden      It never gets too hot here      Last summer it was very hot                                                     |       |                      |   | I'm originally from Stockholm       |
| <b>Sports:</b><br>Do you like to do sport?      Do you like to watch sport on tv?      Which sports do you like?      Skiing dangerous      Robot can't do sport       |       |                      |   | My name is Neil                     |
| Robot like watching sport      Robot watches skking      Maika broke leg      Robot scared of skiing                                                                   |       |                      |   | I am a Furhat robot                 |
| <b>Feelings:</b><br>I like when I can see new faces      Robot: very social      Students are interesting      Student's life is so exciting!                          |       |                      |   | Sounds great                        |
| <b>Geography:</b><br>How good are you in Geography?      User: Good      User: Bad                                                                                     |       |                      |   | Sounds very interesting             |
|                                                                                                                                                                        |       |                      |   | I don't know what you are asking?   |
|                                                                                                                                                                        |       |                      |   | Sorry, I can't answer that question |
|                                                                                                                                                                        |       |                      |   | I don't understand you              |
|                                                                                                                                                                        |       |                      |   | Oh really?                          |
|                                                                                                                                                                        |       |                      |   | Too bad                             |
|                                                                                                                                                                        |       |                      |   | <b>Gaze:</b>                        |
|                                                                                                                                                                        |       |                      |   | Gaze down left                      |
|                                                                                                                                                                        |       |                      |   | Gaze down right                     |
|                                                                                                                                                                        |       |                      |   | Gaze up left                        |
|                                                                                                                                                                        |       |                      |   | Gaze up right                       |
|                                                                                                                                                                        |       |                      |   | Gaze away                           |

#### Session 2

| Wake up robot                                                                                                                                    | Start | Start the game | Q | General responses:                  |
|--------------------------------------------------------------------------------------------------------------------------------------------------|-------|----------------|---|-------------------------------------|
| <b>Previous Score:</b> <b>Scoreboard:</b> <b>Country:</b> <b>Going home:</b> <b>Study:</b> <b>Geography:</b>                                     |       |                |   | Yes                                 |
| <b>Introduction:</b><br>Hi, nice to see you again      How are you?      Robot feels good      How is your week?      What did you do last week? |       |                |   | No                                  |
| I was quite busy last week      I met a lot of students      No time to relax      Working extra hours                                           |       |                |   | Remember my name?                   |
| <b>Valborg:</b><br>What did you do for?      Did you enjoy V?      Did you like it?      Boat race?      Robot couldn't go                       |       |                |   | Robot can't pronounce               |
| <b>First session:</b><br>It was fun      We scored %score%      It was quite a good score      We can do better      What do you think?          |       |                |   | I'm very young                      |
| Say scoreboard      Remember countries?      Robot: remembers countries      Robot: say remembered      User: geo perception                     |       |                |   | Few people believe it               |
| However: Score high      Indeed: Score high      However: Score low      Indeed: Score low                                                       |       |                |   | I look older                        |
| That was pretty good      That is really amazing      Don't worry we can improve      Faster if location first      Don't say history of country |       |                |   | My name is Neil                     |
| <b>Home:</b><br>User: %going home%      Do you miss your family?      Do you miss being in %origin%?      What do you miss about it?             |       |                |   | I am a Furhat robot                 |
| Do you have any siblings?      How old are they?      Robot misses home                                                                          |       |                |   | I'm originally from Stockholm       |
| <b>Study:</b><br>Do you like studying %study%      Free time?      Dream job?      Robot: Would like to help people                              |       |                |   | Sounds great                        |
| <b>Gaze:</b><br>Gaze down left      Gaze down right      Gaze up left      Gaze up right      Gaze away                                          |       |                |   | Let me think about it               |
|                                                                                                                                                  |       |                |   | I am not sure                       |
|                                                                                                                                                  |       |                |   | Sounds very interesting             |
|                                                                                                                                                  |       |                |   | I don't know what you are asking?   |
|                                                                                                                                                  |       |                |   | Sorry, I can't answer that question |
|                                                                                                                                                  |       |                |   | I don't understand you              |
|                                                                                                                                                  |       |                |   | Oh really?                          |
|                                                                                                                                                  |       |                |   | Too bad                             |

## Session 3

| Wake up robot                                                                                                                                         | Start | Start the game | Q | General responses:                  |
|-------------------------------------------------------------------------------------------------------------------------------------------------------|-------|----------------|---|-------------------------------------|
| Score Session 1:      Score Session 2:      Total Score: NaN                                                                                          |       |                |   | Yes                                 |
| <b>Introduction:</b>                                                                                                                                  |       |                |   | No                                  |
| Hi there      How are you?      I'm fine, thanks.      Looks like this is already the last time we're meeting. At least for now.                      |       |                |   | Remember my name?                   |
| <b>Last week:</b>                                                                                                                                     |       |                |   | Robot can't pronounce               |
| What have you been up to lately?      Some students from a high school came...      They wanted to know...      They think I can...                   |       |                |   | I'm very young                      |
| Good idea?      Could I help?      What can I be used for?      Great to work in schools                                                              |       |                |   | Few people believe it               |
| <b>First session:</b>                                                                                                                                 |       |                |   | I look older                        |
| I can't wait to start      We scored %score%      In total, we scored %score_total%      We need %difference% to become the best overall team         |       |                |   | My name is Neil                     |
| Hard to accomplish      That seems doable      We can make it in the top 10      We can still score quite well                                        |       |                |   | I am a Furhat robot                 |
| It's a very good progression      Let's keep up with the good work      Let's try to do better this time      I think we can do even better this time |       |                |   | I'm originally from Stockholm       |
| Enough experience to improve      Remember countries?      Robot: remembers countries      Hard to pronounce      Viet Nam                            |       |                |   | Sounds great                        |
| <b>Competitive:</b>                                                                                                                                   |       |                |   | Nice                                |
| Are you a competitive person?      That explains a lot      Robot is competitive                                                                      |       |                |   | Let me think about it               |
| <b>Weather:</b>                                                                                                                                       |       |                |   | I am not sure                       |
| It was very rainy last week      Spring has not arrived      Summer hasn't arrived      Summer is there      Finally nicer                            |       |                |   | Sounds very interesting             |
| <b>Gaze:</b>                                                                                                                                          |       |                |   | Sorry, I can't answer that question |
| Gaze down left      Gaze down right      Gaze up left      Gaze up right      Gaze away                                                               |       |                |   | I don't understand you              |

## 1.2 Game Interface

| Points<br>0                                                                                           | Time | Enable Game                                                                                                                                                                                                                                                      | G                                                                                                                                                           |
|-------------------------------------------------------------------------------------------------------|------|------------------------------------------------------------------------------------------------------------------------------------------------------------------------------------------------------------------------------------------------------------------|-------------------------------------------------------------------------------------------------------------------------------------------------------------|
|                    |      | <b>Countries correctly identified:</b>                                                                                                                                                                                                                           | <b>Countries the agent knows about:</b>                                                                                                                     |
|                                                                                                       |      | <ul style="list-style-type: none"><li>America<ul style="list-style-type: none"><li>Brazil</li><li>Canada</li><li>Mexico</li><li>United States</li></ul></li><li>Asia<ul style="list-style-type: none"><li>China</li><li>India</li><li>Russia</li></ul></li></ul> | <ul style="list-style-type: none"><li>Australia</li><li>Europe<ul style="list-style-type: none"><li>Italy</li><li>Sweden</li><li>France</li></ul></li></ul> |
| <b>Countries Remembered:</b>                                                                          |      | <b>Countries Forgotten:</b>                                                                                                                                                                                                                                      |                                                                                                                                                             |
| <b>Questions:</b>                                                                                     |      | <b>Moving on</b>                                                                                                                                                                                                                                                 |                                                                                                                                                             |
| So which one is it?      What does it look like?      Location?      What's the name?                 |      | Last chance - move on      Let's move on      Request next target      Click next question                                                                                                                                                                       |                                                                                                                                                             |
| Which continent?      East or west?      North or south?      Where exactly?                          |      | <b>(Not) scoring points</b>                                                                                                                                                                                                                                      |                                                                                                                                                             |
| Is it next to the ocean?      Which does it border?      What's the shape?                            |      | Oh (negative)      Sorry      Nice!      Yay                                                                                                                                                                                                                     |                                                                                                                                                             |
| <b>Not identified:</b>                                                                                |      | <b>Remembering:</b>                                                                                                                                                                                                                                              |                                                                                                                                                             |
| Don't know where      I still can't identify it      I need more information      Continue describing |      | Robot remembers      I don't remember that one      Robot does not remember                                                                                                                                                                                      |                                                                                                                                                             |
| <b>Question Responses:</b>                                                                            |      | <b>Furhat expression:</b>                                                                                                                                                                                                                                        | <b>Furhat Gaze:</b>                                                                                                                                         |
| Yes      Okay      No      Mh                                                                         |      | Smile      Frown      User      Map                                                                                                                                                                                                                              |                                                                                                                                                             |
| <b>Off Topic:</b>                                                                                     |      | <b>Furhat Gaze (Map):</b>                                                                                                                                                                                                                                        |                                                                                                                                                             |
| Not sure what you're talking about      Let's get back to the game      I don't understand you        |      | N. America      S. America      Europe      Africa      Asia      Australia                                                                                                                                                                                      |                                                                                                                                                             |

## 1.3 Post-Game Social Chat

### Session 1

| Wake up robot                                                                                                                                                                                                                                                   | Start | Enable Questionnaire | Q | General responses:                |
|-----------------------------------------------------------------------------------------------------------------------------------------------------------------------------------------------------------------------------------------------------------------|-------|----------------------|---|-----------------------------------|
| <b>Countries correctly identified:</b><br><b>Game Performance:</b><br>Good performance (15+)    Okay performance (10-15)    Bad performance (0-10)<br>Are you satisfied?    How do you think we could improve?    Is there anything we can do better next time? |       |                      |   | Yes                               |
| <b>Fun:</b><br>Anyway, I think it was pretty fun.    Glad to hear you had fun, too    Oh really? Sorry to hear that.    Why did you not like it?                                                                                                                |       |                      |   | No                                |
| <b>Travelling:</b><br>Have you been?    Which one?    Tell me more about it.    Is it hot there?    Is it cold there?                                                                                                                                           |       |                      |   | I agree                           |
| What did you like about it?    Do you think you learned something?    Will you remember?    I hope I will...                                                                                                                                                    |       |                      |   | Good point                        |
| What did you do there?    Did you like it?    What did you like about it?    What did you do during the day?                                                                                                                                                    |       |                      |   | Interesting. I'll think about it. |
| Where else have you been?    What did you eat there?    Robot wants to try food    Wearing a hat                                                                                                                                                                |       |                      |   | Nice                              |
| Robot: France    Airport Inspection    Maiké - Nepal    Natalia - Colombia    Giulia - Italy    Sebastian - Portugal                                                                                                                                            |       |                      |   | That sounds amazing               |
|                                                                                                                                                                                                                                                                 |       |                      |   | I would love to see it            |
|                                                                                                                                                                                                                                                                 |       |                      |   | No I haven't                      |
|                                                                                                                                                                                                                                                                 |       |                      |   | No I didn't                       |
|                                                                                                                                                                                                                                                                 |       |                      |   | What do you mean?                 |
|                                                                                                                                                                                                                                                                 |       |                      |   | Thanks                            |
|                                                                                                                                                                                                                                                                 |       |                      |   | <b>Gaze:</b>                      |
|                                                                                                                                                                                                                                                                 |       |                      |   | Gaze down left                    |
|                                                                                                                                                                                                                                                                 |       |                      |   | Gaze down right                   |
|                                                                                                                                                                                                                                                                 |       |                      |   | Gaze up left                      |
|                                                                                                                                                                                                                                                                 |       |                      |   | Gaze up right                     |
|                                                                                                                                                                                                                                                                 |       |                      |   | Gaze away                         |

### Session 2

| Wake up robot                                                                                                                                          | Start           | Enable Questionnaire | Q        | General responses: |            |                                   |
|--------------------------------------------------------------------------------------------------------------------------------------------------------|-----------------|----------------------|----------|--------------------|------------|-----------------------------------|
| Score: 0                                                                                                                                               | Previous Score: | Scoreboard:          | Country: | Capital:           | Travelled: | Yes                               |
| <b>Game Performance:</b><br>We scored %score%    Say scoreboard    Next session will be better    That is amazing    How can we repeat that?           |                 |                      |          |                    |            | No                                |
| Good performance (15+)    Okay performance (10-15)    Bad performance (0-10)    Performance: Better    Performance: Same    Performance: Worse         |                 |                      |          |                    |            | I agree                           |
| Are you satisfied?    How do you think we could still improve?    Is there anything we can do better next time?    I should study geography more       |                 |                      |          |                    |            | Good point                        |
| Do you think our strategy was better this time?    Did you feel it was easier this time?    I think it was easier after we got a bit of practice.      |                 |                      |          |                    |            | Interesting. I'll think about it. |
| <b>Fun:</b><br>I personally had even more fun this time    Glad to hear that    Oh really? Sorry to hear that.    Why did you not like it?             |                 |                      |          |                    |            | Nice                              |
| What did you like about it?    Will you remember more?    I'm sure next time I will remember more.                                                     |                 |                      |          |                    |            | That sounds amazing               |
| <b>Travelling:</b><br>You have been to %stravelled%    Which countries would you like to visit in the future?    Is it hot there?    Is it cold there? |                 |                      |          |                    |            | I would love to see it            |
| Why would you like to go there?    What would you like to see there?    You said you are from %origin%    Robot looked at google                       |                 |                      |          |                    |            | No I haven't                      |
| Have you ever been to %scapital_origin%?    Food you miss?    Giulia: Pizza and Pasta    Natalia: Empanadas                                            |                 |                      |          |                    |            | No I didn't                       |
| Robot: Japan    Robot Germany                                                                                                                          |                 |                      |          |                    |            | What do you mean?                 |
|                                                                                                                                                        |                 |                      |          |                    |            | Thanks                            |
|                                                                                                                                                        |                 |                      |          |                    |            | <b>Gaze:</b>                      |
|                                                                                                                                                        |                 |                      |          |                    |            | Gaze down left                    |
|                                                                                                                                                        |                 |                      |          |                    |            | Gaze down right                   |
|                                                                                                                                                        |                 |                      |          |                    |            | Gaze up left                      |
|                                                                                                                                                        |                 |                      |          |                    |            | Gaze up right                     |
|                                                                                                                                                        |                 |                      |          |                    |            | Gaze away                         |

## Session 3

| Wake up robot                           |             | Start                                     |                  | Enable Questionnaire                           |         | Q                                   | General responses:                |                   |
|-----------------------------------------|-------------|-------------------------------------------|------------------|------------------------------------------------|---------|-------------------------------------|-----------------------------------|-------------------|
| Score: 0                                | Scoreboard: | Score Session 1/2: /                      | Total Score: NaN | Travel:                                        | Origin: |                                     | Yes                               |                   |
| <b>Game Performance:</b>                |             |                                           |                  |                                                |         |                                     | No                                |                   |
| That was an awesome last round!         |             | I think this last round was quite okay.   |                  | Well... you can't always win, I guess          |         | Say highscore                       | I agree                           |                   |
| This game we scored %points%            |             | This makes a total of %score_total%       |                  | Say scoreboard                                 |         | Satisfied?                          | Good point                        |                   |
| At least we got better over time!       |             | We got so much better over time           |                  | It's just too bad we don't have another chance |         |                                     | Interesting, I'll think about it. |                   |
| This game was just the exception        |             | Overall, this was our best performance!   |                  | We improved a lot                              |         | Most important thing is taking part | Nice                              |                   |
| <b>Robot remembers:</b>                 |             |                                           |                  |                                                |         |                                     | That sounds amazing               |                   |
| I think I will continue studying        |             | But I surely learned something            |                  | In Asia                                        |         | Next to India                       | In Europe                         | South of France   |
| In South America                        |             | Right were central and south America meet |                  | In Africa                                      |         | On the very East coast              | Right above Australia             |                   |
| Under Sweden                            |             | At the border of Europe and Africa        |                  | Right above Brazil                             |         |                                     |                                   |                   |
| <b>Fun:</b>                             |             |                                           |                  |                                                |         |                                     |                                   |                   |
| I had a lot of fun playing with you     |             | Last meeting :-)                          |                  | Meet again?                                    |         | What would you like to play?        | Tower of Hanoi                    |                   |
| <b>Improve interacting:</b>             |             |                                           |                  |                                                |         |                                     |                                   |                   |
| What can I do better in the future?     |             | I try my best                             |                  | What can I improve?                            |         | Working on personality              |                                   |                   |
| <b>Future travel:</b>                   |             |                                           |                  |                                                |         |                                     |                                   |                   |
| You would travel to %future travel%     |             | Why?                                      |                  | What to see there?                             |         | Cities or nature?                   | Robot not outdoor                 |                   |
| <b>World news:</b>                      |             |                                           |                  |                                                |         |                                     |                                   |                   |
| Are you following the world news a bit? |             | Great Britain                             |                  | Worried about Brexit                           |         | Brexit?                             | Venezuela?                        | So much happening |
| <b>Exams:</b>                           |             |                                           |                  |                                                |         |                                     |                                   |                   |
| Do you have a lot of exams coming up?   |             | Good luck                                 |                  | Ah that's nice then you can relax              |         |                                     |                                   |                   |
| Alright, it is time to say goodbye      |             | It was a real pleasure to play with you   |                  | Learn more about home country                  |         |                                     |                                   |                   |
|                                         |             |                                           |                  |                                                |         |                                     | <b>Gaze:</b>                      |                   |
|                                         |             |                                           |                  |                                                |         |                                     | Gaze down left                    |                   |
|                                         |             |                                           |                  |                                                |         |                                     | Gaze down right                   |                   |
|                                         |             |                                           |                  |                                                |         |                                     | Gaze up left                      |                   |
|                                         |             |                                           |                  |                                                |         |                                     | Gaze up right                     |                   |
|                                         |             |                                           |                  |                                                |         |                                     | Gaze away                         |                   |

## 2 WIZARDING GUIDELINES

### 2.1 RDG-Map Game Interaction

#### 2.1.1 Verbal Reactions

##### Countries

The target countries for each session are enlisted in Table S1.

In Session 1, the robot is able to identify by name only the countries in Table S2. For all the other countries, it needs the verbal description of the interaction partner.

In Session 2 and 3, the robot remembers a few countries that were correctly identified in session 1. These countries are provided in the wizarding interface.

Within the same game interaction, the robot remembers the target countries that it has correctly guessed (i.e., for which it scored points). These are automatically added to the wizarding interface. In addition, it remembers the countries whose name was explicitly mentioned in the interaction and whose location was explained (e.g., in reference to another country).

If the human interaction partner (i.e., the director) names a country that the robot does not know, the robot always responds with “I don’t know where that is”.

##### Continents

The agent can identify continents and broad geographic areas like “East Africa” or “Middle East” by name.

##### Bodies of Water

The robot can also identify the Pacific, Atlantic and Indian Ocean by name. Other bodies of water can be identified as such, but the robot does not know their name. It can however learn the names of the different bodies of water is explicitly taught by the human interaction partner.

Table S1. Target countries per session

| Session 1        | Session 2          | Session 3          |
|------------------|--------------------|--------------------|
| Indonesia        | Mexico             | Laos               |
| Pakistan         | Somalia            | Greece             |
| Italy            | Vietnam            | Great Britain      |
| Lybia            | Turkey             | Nepal              |
| Bolivia          | Colombia           | Cameroon           |
| Nepal            | Greece             | Vietnam            |
| Colombia         | Papua New Guinea   | Portugal           |
| Portugal         | Paraguay           | South Korea        |
| Somalia          | Germany            | Ukraine            |
| Papua New Guinea | Nepal              | Germany            |
| Zambia           | Angola             | Indonesia          |
| Kazakhstan       | Venezuela          | Turkey             |
| Finland          | Algeria            | Haiti              |
| Japan            | Spain              | Chad               |
| Nigeria          | Yemen              | Suriname           |
| Iraq             | Cuba               | Hungary            |
| Iran             | Estonia            | Sudan              |
| Syria            | Thailand           | Argentina          |
| Ireland          | Kyrgyzstan         | Cambodia           |
| Serbia           | Croatia            | Dem. Rep. of Congo |
| Bulgaria         | Afghanistan        | Poland             |
| Madagascar       | Niger              | Bangladesh         |
| Ethiopia         | Chile              | Benin              |
| Canada           | Chad               | Tanzania           |
| Argentina        | Philippines        | Norway             |
| Slovakia         | Togo               | Iceland            |
| Poland           | Panama             | Ivory Coast        |
| Benin            | Jordan             | Ireland            |
| Tanzania         | Mongolia           | Canada             |
|                  | Madagascar         | Madagascar         |
|                  | Korea              | Gabon              |
|                  | Dominican Republic | Tunisia            |
|                  | Eritrea            | Jordan             |
|                  | Taiwan             | Lesotho            |
|                  | Arab Emirates      | Bhutan             |
|                  | Swaziland          | Uruguay            |
|                  | Denmark            | Guinea             |
|                  | Slovakia           | Malaysia           |
|                  | New Zealand        | Senegal            |
|                  | Tunisia            | Honduras           |
|                  |                    | Macedonia          |
|                  |                    | Togo               |

### Landmarks

The robot does not know the name and location of specific landmarks in the world. However, it can learn the name of a landmark if explicitly taught by the human director.

### Relational Information

The robot can determine the following relational information between countries, continents, landmarks and bodies of water:

- *Cardinal directions*: north, south, east, west

**Table S2.** Countries that the robot is able to identify by name.

| <b>America</b>                              | <b>Asia</b>              | <b>Europe</b>             | <b>Oceania</b> |
|---------------------------------------------|--------------------------|---------------------------|----------------|
| Canada<br>United States<br>Mexico<br>Brazil | Russia<br>China<br>India | Sweden<br>France<br>Italy | Australia      |

- *Egocentric directions*: left, right, below, above, up, down, bottom, top, lower, higher

Egocentric directions are interpreted from the director's perspective (from the point of view of the human partner). The agent can count and determine relational information like "two countries above".

### **Shapes and Sizes**

The robot can generally identify the shape of a country and make associations to shapes of commonly known objects like animals, plants or household objects. It is the wizard who estimates whether a shape description given by the human partner fits a country.

The robot can interpret size descriptions in relation to the surrounding countries in the same region. For instance, if a country is described as small, the robot can only evaluate if it is smaller than the average country in the surrounding area.

### **Asking Questions**

The robot can ask several questions to identify a country. However, it only asks questions after the director (i.e., the human partner) has given an initial description of the country. Questions are used if there is only one particular information that distinguishes two otherwise equally likely countries, or if the director has not provided any clue that could help the robot in identifying the target country. The agent can select from the following list of questions:

- **Shape:** To inquire about the shape of the country, the agent asks "What does it look like?" or "What is the shape of the country?". The first alternative is preferred and only exchanged if the director misinterprets the question.
- **Location:** To get some more information about the location of the country, the robot asks: "Can you say more about the location?", "Is it next to the ocean?" or "Which countries does it border?". The latter one is only used if the agent suspects it knows one of the neighboring countries by name.
- **Name:** In case the agent suspects it already knows the name of the target country, it can ask: "What's the name?"
- **Continent:** The agent can inquire which continent a country is in by asking: "Which continent?"
- **Clarifications:** To clarify something the director has said, the agent can ask: "East or west?" or "North or south?" or "Where exactly?". These are typically used when the location description in relation to a country or continent given by the director was under-specified.

In addition to the specific questions, the robot can also make use of three generic phrases to get the director to provide further descriptions: "I still can't identify it", "I need more information" and "Continue describing".

## **Answering Questions**

The robot can answer simple yes / no questions, for instance: “Do you know where Syria is?”. The agent can also answer generic questions about the game rules, e.g., whether the director can say the countries name (“Can I just say the name?”). If the question does not fall in one of these two categories, the agent responds: “I’m not sure what you’re talking about”, or “I don’t understand you”.

## **Skipping**

The robot does not ask to skip a country. If the director asks if it is okay to skip a country the agent makes the most educated guess it can make at that point in order to try to score points if possible.

## **Backchannels**

If the robot understood a previous cue and a short pause in the director’s speech is detected, it acknowledges the understanding saying: “Okay.” This acknowledgement can be followed directly by a question. If the agent cannot determine the referent of a description, it can utter: “Mh”, which can be followed by a question again.

## **Reacting to Pauses**

In the very beginning of the game, if the director does not start describing the target country within 30 seconds (the typical loading time of the iPad was about 20 seconds), the robot says: “So which one is it?” The same question is asked if the director requested a new target and did not give a single description for five seconds. If pauses longer than 5 seconds occur within a block of descriptive cues, the agent can either utilize the backchannel: “Mh” or ask a question to get the conversation going again. If the pause persists and the director is not reactive to the agent’s question, the agent can direct the gaze towards the user for a period of about two seconds, before directing it back to the map.

## **Off-topic Talk**

If the director talks about something the robot does not understand or tries to engage the robot in a topic outside the scope of the game, the agent says: “Let’s get back to the game” or “I’m not sure what you’re talking about.”

## **Moving On**

In case the robot has already made two guesses and has hence no additional guesses left, it can inform the director about this by saying: “This was our last chance. We have to move on”. In case the director does not request the next target country, the agent can say: “Let’s move on”, “Request the next target” or “Just click on the next question button.” The latter can also be used if the director raises the question whether or how to move forward after the agent made a correct selection.

## **Reactions to Scoring and Not Scoring Points**

If the robot’s selection was correct, the agent randomly picks between saying: “Nice!” and “Yay!” In case a selection was wrong, the agent can respond with: “Sorry” and “Oh”. In both cases, the agent gives such a verbal reaction only occasionally.

## **Remembering**

In the second and third session, if the director mentions a country that was identified in one of the previous sessions and that the robot remembers, the robot says: “I remember this country.” In case the country was part of a previous round, but the robot does not remember where this country is located, it says: “I don’t remember that one.”

### 2.1.2 Country Selection

If the information provided by the Director are sufficient to identify the country (e.g., the combination of cues given has a high probability to belong to exactly one country on the world map), the wizard selects the corresponding country on the world map. The agent then automatically says “Got it!” or, in case this was the second guess, “Oh, I see, I got it”.

In case the information given is not sufficient, an extended amount of time has already elapsed, and multiple questions by the agent did not lead to a high enough probability that one country is correct, the wizard selects a random country from the set of possible ones given the current description.

If the director does not move on after the agent identified the correct target country and takes a break of at least 2 seconds in descriptions, the agent says: “I got it. Just move on”.

### 2.1.3 Gaze

By default, during the game interaction, Furhat’s gaze is directed towards the center of the map. Whenever the director mentions a known country, region or continent on the world map, the agent directs its gaze towards that part of the world. The gaze then stays at that location until the next known region is mentioned. In case of long pauses by the director or in case the director does not react to questions, the robot directs its gaze towards the director for about two seconds, before directing it back to the center of the map.

## 2.2 Social Chat

### 2.2.1 Verbal Reactions

The agent starts the different topics by following the wizarding interface from the top to the bottom (see Section 1.1). The left-most button always represents the opening sentence said by the agent to start a topic. The button is followed by one or several follow-up questions or responses to potential replies from the human interaction partner. The buttons to prompt the follow-up questions and responses of the robot are located to the right of the last response button.

There are a few generic questions the agent can answer independent of the current topic. Whenever one of the generic responses to the right fits a question, the agent will answer it. Otherwise, it will say: “I don’t know what you are asking”, “Sorry, I can’t answer that question” or “I don’t understand you”.

### 2.2.2 Gaze

When the user asks a question to the robot, the robot can direct its gaze towards the bottom left or bottom right to give the impression of thinking about the question. This is only used seldom (maximum of twice per session and social chat interaction), never used for two questions in a row, and preferably used for questions that require some reflection process (e.g., not if the human partner asks the robot how it feels).
